# Supplementary figures and images for: Single-Dose Psilocybin for Depression With Severe Treatment Resistance: An Open-Label Trial
Source: Atypon-hosted journal article supplement (doi:10.1176/appi.ajp.20231063), 2025-01-01

Figure S1

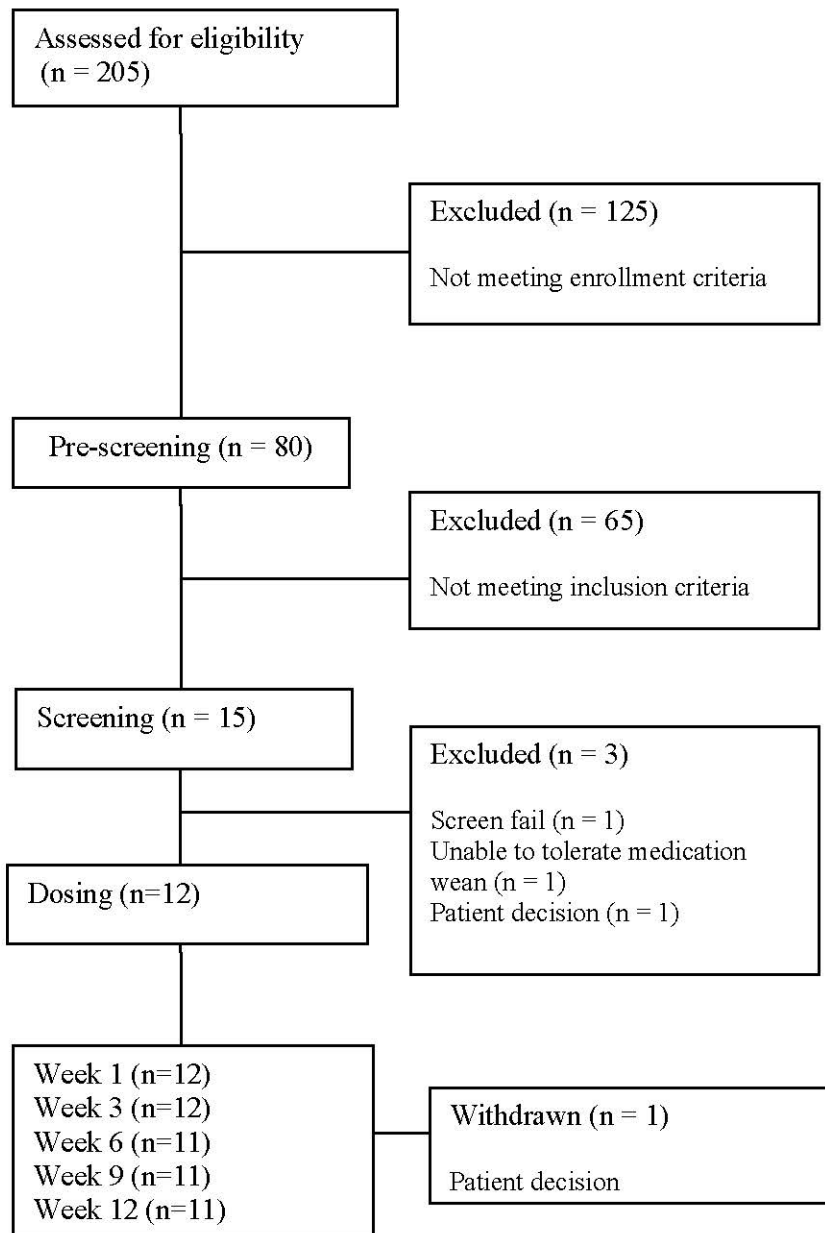

Figure S2

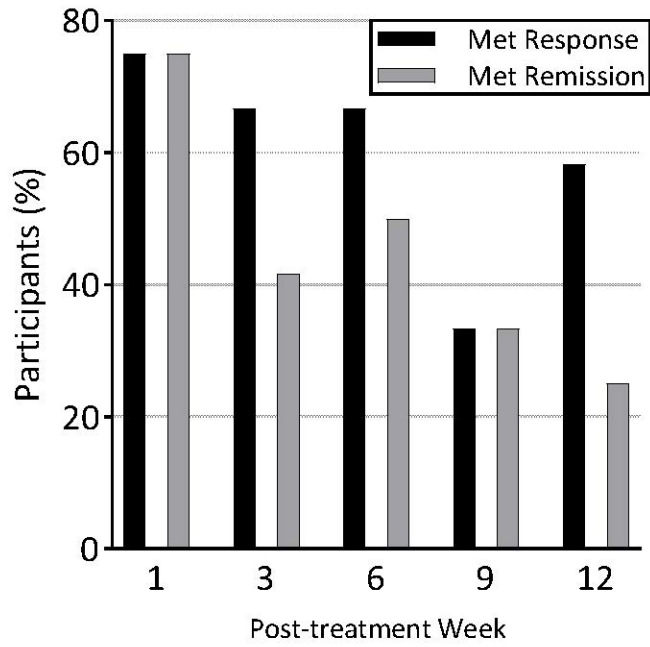

Figure S3

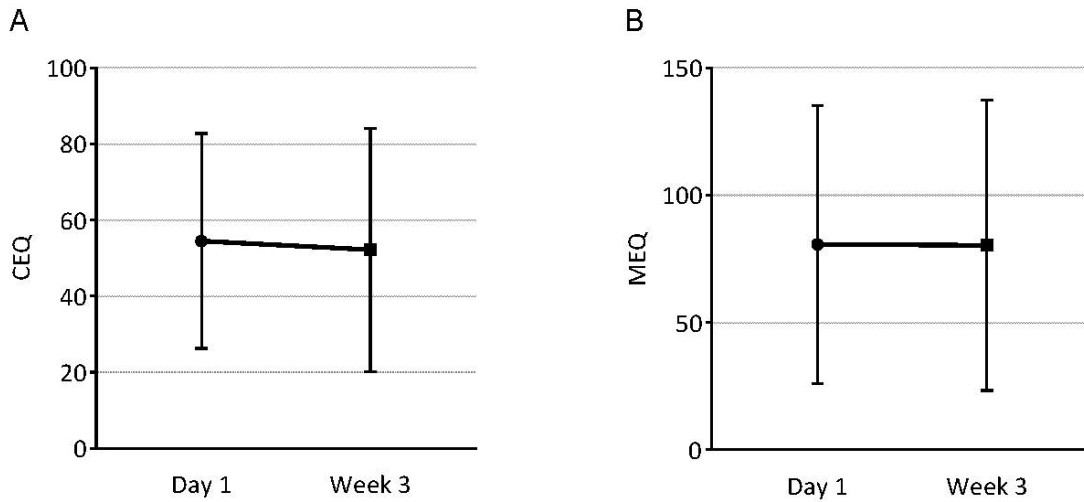

Supplement: appi.ajp.20231063.ds001.pdf [file appi.ajp.20231063.ds001.pdf]
